# Supplementary material for: A Phenome-Wide Association Study of the Effects of Fusarium graminearum Transcription Factors on Fusarium Graminearum Virus 1 Infection
Source: Front Microbiol. 2021 Feb 11;12:622261. doi: 10.3389/fmicb.2021.622261 (PMC7904688; doi:10.3389/fmicb.2021.622261)
Supplement: Supplementary file 2 [file Table_1.xlsx]

## Sheet: Total
Supplementary Table 1. Phenotype summary of FgV1-infected TF gene-deletion mutants.
	Locus ID	Gene name	FgV1-infected TF deletion mutants					Expression (Transcriptomic based)												Stress response
			Virus- free	FgV1 infection	Growth reduction infection	colony morphology (virus-infected)		FgV1a	FgV2a	FgV3a	FgV4a	FgHV1b	DEG		Multiple defects in deletion mutantc	DON	DNA damage response (DDR)d	Os	ROS	Fung	CW	pH4	pH11	TF Family	Description
	FGSG_04220	FgSwi6	1g	2h	40.3991										NP, Vir, DON, MM	2f								APSES	hypothetical protein similar to Swi6
	FGSG_05283	GzAPSES002	4	2	40.3129											4								APSES	conserved hypothetical protein
	FGSG_10129	FgStuA	3	3	80.2339										NP, Vir, DON, MM	0								APSES	hypothetical protein similar to transcription factor involved in conidiation
	FGSG_10384	GzAPSES004	1	N/A											NP, Vir, DON, MM	0								APSES	hypothetical protein similar to ANK-repeat protein MBP1
	FGSG_06071	GzAT001	1	N/A											NP, Vir, MM	4								AT-rich interaction region	conserved hypothetical protein
	FGSG_09407	GzAT002	4	2	42.5455											4								AT-rich interaction region	predicted protein
	FGSG_09495	GzAT003	4	3	69.6218											4								AT-rich interaction region	conserved hypothetical protein
	FGSG_00545	GzbHLH001	3	2	34.2458											4							pH11	bHLH	conserved hypothetical protein
	FGSG_00750	GzbHLH002	4	3	87.3472											0								bHLH	hypothetical protein similar to heli-loop-heli DNA-binding domain protein
	FGSG_01139	GzbHLH003	4	2	48.9305											4								bHLH	conserved hypothetical protein
	FGSG_01173	GzbHLH004	2	2	43.6144										NP, DON, MM	0								bHLH	conserved hypothetical protein
	FGSG_01307	GzbHLH005	4	2	50.7229											4		Os						bHLH	conserved hypothetical protein
	FGSG_02516	GzbHLH006	4	2	52.6385											4								bHLH	allergen Fusc 3
	FGSG_02814	GzbHLH007	4	2	53.6579											6								bHLH	conserved hypothetical protein
	FGSG_03313	GzbHLH008	4	2	43.1996											4								bHLH	predicted protein
	FGSG_04035	GzbHLH009	4	2	43.5083											4								bHLH	hypothetical protein
	FGSG_05567	GzbHLH010	N/Ai													N/A								bHLH
	FGSG_06262	GzbHLH011	4	3	71.6551								△HATk			4								bHLH	conserved hypothetical protein
	FGSG_07790	GzbHLH012	4	2	34.8149											4								bHLH	predicted protein
	FGSG_08403	GzbHLH013	4	3	66.0117											4								bHLH	conserved hypothetical protein
	FGSG_09308	GzbHLH014	4	3	75.5595											4								bHLH	conserved hypothetical protein
	FGSG_10440	GzbHLH015	4	2	43.1569											4								bHLH	predicted protein
	FGSG_11658	GzbHLH016	4	2	55.1343											4								bHLH	hypothetical protein
	FGSG_01096	GzBrom001	4	2	41.1829											4								Bromodomain transcription factor	conserved hypothetical protein
	FGSG_06291	GzBrom002	2	N/A											NP, Vir, DON, MM	0		Os	ROS	Fung	CW	pH4	pH11	Bromodomain transcription factor	hypothetical protein similar to transcriptional activator spt7 (salt-sensitive)
	FGSG_09871	GzBrom003	4	3	76.3803											4								Bromodomain transcription factor	conserved hypothetical protein
	FGSG_00515	GzbZIP001	2	2	58.1309											4								bZIP	conserved hypothetical protein
	FGSG_01555	ZIF1	3	2	50.4381	yellow							Oxil		NP, Vir, DON	0		Os		Fung			pH11	bZIP	conserved hypothetical protein
	FGSG_02398	ZEB2	4	2	45.4785											4								bZIP	related to control of transcription of the zearalenone biosynthesis cluster genes
	FGSG_02750	GzbZIP004	4	2	39.6894											4								bZIP	predicted protein
	FGSG_02939	GzbZIP005	4	2	49.2053											4								bZIP	predicted protein
	FGSG_03040	GzbZIP006	4	2	46.6504											4								bZIP	predicted protein
	FGSG_05171	GzbZIP007	3	2	40.535								Oxi		NP, Vir, DON, MM	0		Os	ROS	Fung			pH11	bZIP	conserved hypothetical protein
	FGSG_05930	GzbZIP008	4	2	44.2252											4								bZIP	conserved hypothetical protein
	FGSG_06421	GzbZIP009	4	2	44.9437											4								bZIP	conserved hypothetical protein
	FGSG_06651	GzbZIP010	2	2	36.8655								△RNAij			0								bZIP	conserved hypothetical protein
	FGSG_07789	GzbZIP011	3	2	40.7003											4								bZIP	predicted protein
	FGSG_07863	GzbZIP012	4	2	43.7857											4								bZIP	hypothetical protein
	FGSG_08800	Fgap1	4	2	61.649								Oxi			4								bZIP	conserved hypothetical protein
	FGSG_09001	GzbZIP014	4	2	42.3103											4								bZIP	predicted protein
	FGSG_09286	GzbZIP015	4	2	46.2534	white fluffy aerial mycelia										4								bZIP	conserved hypothetical protein (GCN4; yeast)
	FGSG_09832	GzbZIP016	2	2	48.818											4								bZIP	conserved hypothetical protein
	FGSG_10142	FgATF1	4	2	50.9309											4								bZIP	hypothetical protein similar to bZIP transcription factor AtfA
	FGSG_11623	GzbZIP018	4	2	40.5332											4						pH4		bZIP	conserved hypothetical protein
	FGSG_12345	GzbZIP019	4	3	64.7783											4								bZIP	conserved hypothetical protein
	FGSG_13313	GzbZIP020	4	2	56.4579											4								bZIP	conserved hypothetical protein
	FGSG_13759	GzbZIP021	4	2	41.0394											4								bZIP	conserved hypothetical protein
	FGSG_10546	GzbZIP022	4	2	45.5555											4								bZIP	conserved hypothetical protein
	FGSG_00240	GzC2H001	4	2	58.3234											4								C2H2 zinc finger	conserved hypothetical protein
	FGSG_00342	GzC2H002	4	3	85.0922											4								C2H2 zinc finger	predicted protein
	FGSG_00477	GzC2H003	3	1	32.4737										NP, Vir, MM	4								C2H2 zinc finger	conserved hypothetical protein
	FGSG_00584	GzC2H004	4	2	52.7247											2								C2H2 zinc finger	conserved hypothetical protein
	FGSG_00653	GzC2H005	4	2	42.4854											4						pH4		C2H2 zinc finger	HIT-type domain-containing protein
	FGSG_00764	GzC2H006	4	2	52.4383											4								C2H2 zinc finger	hypothetical protein
	FGSG_01022	GzC2H007	3	2	57.0108										NP, Vir, DON	2							pH11	C2H2 zinc finger	conserved hypothetical protein
	FGSG_01106	FgArs2	4	1	28.0824										Vir, DON	2	DDR							C2H2 zinc finger	Arsenite-resistance protein 2
	FGSG_01214	GzC2H009	4	2	43.3988											4								C2H2 zinc finger	predicted protein
	FGSG_01298	GzC2H010	4	2	51.2289											4								C2H2 zinc finger	conserved hypothetical protein
	FGSG_01310	GzC2H011	4	2	56.199											4								C2H2 zinc finger	conserved hypothetical protein
	FGSG_01319	GzC2H012	4	2	43.2555											4								C2H2 zinc finger	conserved hypothetical protein
	FGSG_01341	GzC2H013	4	2	49.1999											4							pH11	C2H2 zinc finger	conserved hypothetical protein
	FGSG_01350	GzC2H014	2	2	43.0423										NP, Vir, DON, MM	2								C2H2 zinc finger	conserved hypothetical protein
	FGSG_01576	GzC2H015	4	2	47.3448											4								C2H2 zinc finger	conserved hypothetical protein
	FGSG_01877	pcs1	4	2	36.3534											4								C2H2 zinc finger	conserved hypothetical protein
	FGSG_02635	GzC2H017	4	2	49.8196											4								C2H2 zinc finger	conserved hypothetical protein
	FGSG_02743	GzC2H018	4	2	49.4503											4								C2H2 zinc finger	conserved hypothetical protein
	FGSG_02788	GzC2H019	4	2	39.9443											4								C2H2 zinc finger	conserved hypothetical protein
	FGSG_02803	GzC2H020	4	2	40.5601											4							pH11	C2H2 zinc finger	conserved hypothetical protein
	FGSG_03234	GzC2H021	4	2	39.0866											4								C2H2 zinc finger	conserved hypothetical protein
	FGSG_03536	TRI6	4	2	42.7123											0								C2H2 zinc finger	positively regulates the expression of other TRI genes in the DON biosynthesis pathway
	FGSG_03881	TRI15	4	2	41.7481											4								C2H2 zinc finger	might be a negative regulator of trichothecene biosynthesis
	FGSG_04083	GzC2H024	4	2	47.2703	white fluffy aerial mycelia										4								C2H2 zinc finger	predicted protein
	FGSG_04084	GzC2H025	4	2	39.3499											4								C2H2 zinc finger	hypothetical protein
	FGSG_04134	GzCON7	2	2	46.5175										NP, Vir, DON, MM	2								C2H2 zinc finger	hypothetical protein
	FGSG_04288	GzC2H028	4	2	51.9623											4								C2H2 zinc finger	Related to 26S proteasome subunit RPN4
	FGSG_04293	GzC2H029	4	2	47.9381											4								C2H2 zinc finger	conserved hypothetical protein
	FGSG_04889	GzC2H031	4	2	56.9542											4								C2H2 zinc finger	hypothetical protein similar to RING-6
	FGSG_04932	GzC2H032	4	2	49.9385											4								C2H2 zinc finger	conserved hypothetical protein
	FGSG_05041	GzC2H034	4	2	49.8586											4								C2H2 zinc finger	conserved hypothetical protein
	FGSG_05359	GzC2H035	4	2	41.8137											4								C2H2 zinc finger	hypothetical protein
	FGSG_05381	GzC2H036	4	2	50.4109											4							pH11	C2H2 zinc finger	hypothetical protein
	FGSG_05399	GzC2H037	4	2	47.5494											6								C2H2 zinc finger	conserved hypothetical protein
	FGSG_05857	GzC2H038	4	3	74.88											4								C2H2 zinc finger	hypothetical protein similar to splicing factor 3a subunit 3
	FGSG_06002	GzC2H039	4	2	42.3727											4								C2H2 zinc finger
	FGSG_06168	GzC2H040	4	2	45.6265											4								C2H2 zinc finger	conserved hypothetical protein
	FGSG_06311	GzC2H041	4	2	43.6028											4								C2H2 zinc finger	conserved hypothetical protein
	FGSG_06427	GzC2H042	4	2	38.0026											4								C2H2 zinc finger	conserved hypothetical protein
	FGSG_06684	GzC2H043	4	2	45.0214											4								C2H2 zinc finger	conserved hypothetical protein
	FGSG_06701	GzC2H044	4	2	53.1187											4								C2H2 zinc finger	conserved hypothetical protein
	FGSG_06871	FgMSN2	2	3	64.7403										NP, Vir, MM	4								C2H2 zinc finger	hypothetical protein similar to cutinase G-bo binding protein
	FGSG_06934	GzC2H046	4	2	35.2036											4								C2H2 zinc finger	hypothetical protein similar to C2H2 type zinc finger domain protein
	FGSG_07052	GzC2H047	3	2	60.7513											4								C2H2 zinc finger	predicted protein
	FGSG_07075	GzC2H048	4	2	35.6649											4		Os					pH11	C2H2 zinc finger	pyruvate carboylase
	FGSG_07187	GzC2H049	4	2	41.3426											4								C2H2 zinc finger	conserved hypothetical protein
	FGSG_07310	GzBrlA	4	2	41.6311											4								C2H2 zinc finger	transcription factor steA
	FGSG_07392	GzC2H051	4	2	45.3943											4								C2H2 zinc finger
	FGSG_07504	GzC2H052	N/A													N/A								C2H2 zinc finger
	FGSG_07735	GzC2H053	4	2	38.2738											4								C2H2 zinc finger	conserved hypothetical protein
	FGSG_07737	GzC2H054	4	2	37.2485											4								C2H2 zinc finger	conserved hypothetical protein
	FGSG_07751	GzC2H055	4	2	45.2908											4								C2H2 zinc finger	conserved hypothetical protein
	FGSG_07753	GzC2H056	4	2	37.1266											4								C2H2 zinc finger	conserved hypothetical protein
	FGSG_07909	GzC2H057	N/A													N/A								C2H2 zinc finger	conserved hypothetical protein
	FGSG_07914	GzC2H058	4	2	60.0229											4								C2H2 zinc finger	conserved hypothetical protein
	FGSG_07928	GzC2H059	3	2	52.0593											4								C2H2 zinc finger	conserved hypothetical protein
	FGSG_07952	GzC2H060	4	3	65.3621											4								C2H2 zinc finger	conserved hypothetical protein
	FGSG_08128	GzC2H061	4	2	53.5781											4								C2H2 zinc finger	conserved hypothetical protein
	FGSG_08138	GzC2H062	4	2	43.9349											4								C2H2 zinc finger	conserved hypothetical protein
	FGSG_08246	GzC2H063	4	2	43.0017											4								C2H2 zinc finger	predicted protein
	FGSG_08434	GzC2H064	4	2	48.6024											4								C2H2 zinc finger	conserved hypothetical protein
	FGSG_08582	GzC2H065	4	2	48.8017											4								C2H2 zinc finger	conserved hypothetical protein
	FGSG_08617	GzC2H066	3	2	42.2253											0								C2H2 zinc finger	hypothetical protein similar to zinc finger protein 58
	FGSG_08646	GzC2H067	4	2	42.4603											4								C2H2 zinc finger	conserved hypothetical protein
	FGSG_08798	GzC2H069	4	2	44.4019											4								C2H2 zinc finger	predicted protein
	FGSG_08845	GzC2H070	N/A													N/A								C2H2 zinc finger	conserved hypothetical protein
	FGSG_08914	GzC2H071	N/A													N/A								C2H2 zinc finger	conserved hypothetical protein
	FGSG_09015	GzC2H072	4	2	36.6162											4								C2H2 zinc finger	conserved hypothetical protein
	FGSG_09368	GzC2H075	4	1	25.7186											4	DDR							C2H2 zinc finger	homolog Saccharomyces cerevisiae MSN2
	FGSG_09410	GzC2H076	3	2	47.7682											4								C2H2 zinc finger	conserved hypothetical protein
	FGSG_09629	GzC2H078	N/A													N/A								C2H2 zinc finger	conserved hypothetical protein
	FGSG_09715	GzC2H079	4	2	38.468											4								C2H2 zinc finger	DNA-binding protein creA
	FGSG_09770	GzC2H080	4	2	35.7885											4								C2H2 zinc finger	conserved hypothetical protein
	FGSG_09857	GzC2H081	4	2	43.1616											4								C2H2 zinc finger	conserved hypothetical protein
	FGSG_10006	GzC2H082	4	2	36.0533											4								C2H2 zinc finger
	FGSG_10162	GzC2H083	4	2	45.1582											4								C2H2 zinc finger	predicted protein
	FGSG_10350	GzC2H084	4	2	36.8488											4								C2H2 zinc finger	predicted protein
	FGSG_10360	GzC2H085	N/A													N/A								C2H2 zinc finger
	FGSG_10369	GzC2H086	4	2	35.6707											4								C2H2 zinc finger
	FGSG_10470	GzC2H088	3	2	35.287								△HAT			4								C2H2 zinc finger
	FGSG_10508	GzC2H089	N/A													N/A								C2H2 zinc finger
	FGSG_10517	GzC2H090	2	2	62.6071										NP, Vir, DON, MM	2								C2H2 zinc finger
	FGSG_11061	GzC2H091	4	2	37.3155											4								C2H2 zinc finger	conserved hypothetical protein
	FGSG_11383	GzC2H092	4	2	36.5528											4								C2H2 zinc finger	conserved hypothetical protein
	FGSG_11416	GzC2H093	4	2	48.3337											4								C2H2 zinc finger	conserved hypothetical protein
	FGSG_11792	GzC2H094	4	1	27.5016											4								C2H2 zinc finger
	FGSG_11799	GzC2H095	4	2	35.7588											4							pH11	C2H2 zinc finger	conserved hypothetical protein
	FGSG_12057	GzC2H096	4	2	40.6588											4								C2H2 zinc finger	predicted protein
	FGSG_12809	GzC2H097	4	2	36.051											4								C2H2 zinc finger	conserved hypothetical protein
	FGSG_12837	GzC2H098	4	2	43.8995											4								C2H2 zinc finger	conserved hypothetical protein
	FGSG_12970	FgPac1	3	2	44.6408											4							pH11	C2H2 zinc finger	pH-response transcription factor pacC/RIM101
	FGSG_12973	GzC2H100	4	2	43.3796											4								C2H2 zinc finger	conserved hypothetical protein
	FGSG_13123	GzC2H102	4	2	56.9986											4								C2H2 zinc finger	hypothetical protein similar to C2H2 transcription factor
	FGSG_13314	GzC2H103	4	2	39.4531											4								C2H2 zinc finger	conserved hypothetical protein
	FGSG_13492	GzC2H104	4	2	45.799											4								C2H2 zinc finger
	FGSG_13711	FgCrz1A	2	3	87.5										NP, Vir, DON, MM	0								C2H2 zinc finger	conserved hypothetical protein
	FGSG_13896	GzC2H106	4	1	33.8766											4								C2H2 zinc finger
	FGSG_13964	GzC2H107	4	2	46.2269								△HAT			4								C2H2 zinc finger	hypothetical protein
	FGSG_08474	GzNot001	N/A													N/A								ccr4-not transcription complex
	FGSG_13746	GzNot002	2	1	31.495										NP, Vir, DON, MM	6								ccr4-not transcription complex	predicted protein
	FGSG_02527	GzDDT	2	2	43.0496											0								DDT	conserved hypothetical protein
	FGSG_02676	GzDNL	4	2	42.4031											4								Zn(II)2Cys6	conserved hypothetical protein
	FGSG_00710	GzGATA001	4	2	43.4054											4								GATA type zinc finger	cutinase gene palindrome-binding protein
	FGSG_03281	GzGATA002	4	2	46.7964											4								GATA type zinc finger	hypothetical protein
	FGSG_04626	GzGATA003	4	2	47.6499											4								GATA type zinc finger	predicted protein
	FGSG_07830	GzGATA004	4	2	37.1337											4								GATA type zinc finger	hypothetical protein
	FGSG_07941	GzGATA005	4	2	43.7686											4								GATA type zinc finger	white collar 1 protein
	FGSG_08634	GzGATA006	4	2	42.407											2								GATA type zinc finger	nitrogen regulatory protein areA
	FGSG_09565	GzGATA007	4	2	39.0123								△HAT			4	DDR							GATA type zinc finger	homologue of the Aspergillus nidulans SreA
	FGSG_05073	GzGATA008	N/A													N/A								GATA type zinc finger
	FGSG_06356	GzGH	4	2	51.7183											4								Grainyhead/CP2	negatively associated with sexual development
	FGSG_10868	GzHSF003	4	2	40.3765											4								Winged helix repressor DNA-binding	conserved hypothetical protein
	FGSG_00374	GzAra001	N/A													N/A								Helix-turn-helix, AraC type
	FGSG_01295	GzAra002	4	3	35.0109											4								Helix-turn-helix, AraC type	conserved hypothetical protein
	FGSG_04516	GzAra003	4	2	37.9112											4								Helix-turn-helix, AraC type	conserved hypothetical protein
	FGSG_05373	GzAra004	4	2	38.0379											4								Helix-turn-helix, AraC type	conserved hypothetical protein
	FGSG_06805	GzAra005	4	2	48.1358											4								Helix-turn-helix, AraC type	conserved hypothetical protein
	FGSG_06849	GzAra006	4	2	41.7694											4								Helix-turn-helix, AraC type	pre-mRNA-splicing ATP-dependent RNA helicase PRP28
	FGSG_09389	GzAra007	4	2	36.2753											4								Helix-turn-helix, AraC type	conserved hypothetical protein
	FGSG_10948	GzAra008	4	2	56.7408	yellow										4								Helix-turn-helix, AraC type	conserved hypothetical protein
	FGSG_00352	GzCCAAT001	4	2	35.4306											6								Heteromeric CCAAT factors	hypothetical protein similar to CCAAT-binding comple subunit HAP2
	FGSG_01182	FCT1	2	1	23.3231											4	DDR					pH4		Heteromeric CCAAT factors	CCAAT-binding transcription factors, homologues of Saccharomyces cerevisiae DBP4
	FGSG_02608	GzCCAAT003	4	2	56.3317											4								Heteromeric CCAAT factors	hypothetical protein similar to CCAAT-binding protein subunit HAP5
	FGSG_05304	FCT2(FgHLTF1)	3	1	30.1855										NP, Vir, DON, MM	2	DDR					pH4		Heteromeric CCAAT factors	CCAAT-binding transcription factors, putative histone-like transcription factor,
	FGSG_05498	GzCCAAT005	4	2	44.3632											4								Heteromeric CCAAT factors	conserved hypothetical protein
	FGSG_07087	GzCCAAT006	4	1	31.703											4								Heteromeric CCAAT factors	hypothetical protein similar to CCAAT-binding protein subunit HAP3
	FGSG_09217	GzCCAAT007	4	2	45.7023								△RNAi			4								Heteromeric CCAAT factors	conserved hypothetical protein
	FGSG_11627	GzCCAAT008	4	2	44.6511											4								Heteromeric CCAAT factors
	FGSG_00307	GzHMG001	4	2	59.2445											4								HMG	conserved hypothetical protein
	FGSG_00385	FgNHP6A	3	1	30.9022										NP, Vir, DON, MM	2						pH4		HMG	probable NHP6B - nonhistone chromosomal protein
	FGSG_00678	GzHMG003	4	2	42.6548											4								HMG	predicted protein
	FGSG_00696	GzHMG004	4	2	44.596											4								HMG	conserved hypothetical protein
	FGSG_00729	GzHMG005	4	2	37.8338											4								HMG	conserved hypothetical protein
	FGSG_00799	GzHMG006	4	2	49.6525											4								HMG	conserved hypothetical protein
	FGSG_00829	GzHMG007	4	2	38.3632											4								HMG	conserved hypothetical protein
	FGSG_01201	GzHMG008	4	2	38.6878											4								HMG	predicted protein
	FGSG_01327	GzHMG009	4	2	55.4977											2								HMG	hypothetical protein
	FGSG_01366	GzHMG010	4	2	35.3502								SDm			4								HMG	conserved hypothetical protein
	FGSG_01488	GzHMG011	4	1	32.9414											4	DDR							HMG	conserved hypothetical protein
	FGSG_01512	GzHMG012	4	2	40.6947	yellow										4								HMG	conserved hypothetical protein
	FGSG_01934	GzHMG013	4	2	41.3219											4								HMG	conserved hypothetical protein
	FGSG_04379	GzHMG014	4	2	40.2771											4								HMG	conserved hypothetical protein
	FGSG_04557	GzHMG015	4	2	43.1382											4								HMG	hypothetical protein
	FGSG_05151	GzHMG016	4	2	38.5433											4								HMG	conserved hypothetical protein
	FGSG_05233	GzHMG017	4	2	35.8738											4								HMG	conserved hypothetical protein
	FGSG_05604	GzHMG018	4	2	38.6885											4								HMG	hypothetical protein
	FGSG_06231	GzHMG019	4	2	40.8427											4								HMG	conserved hypothetical protein
	FGSG_07020	GzHMG020	4	2	38.4881											4								HMG	conserved hypothetical protein
	FGSG_07116	GzHMG021	3	2	37.724											4								HMG	conserved hypothetical protein
	FGSG_07144	GzHMG022	4	2	41.4025											4								HMG	hypothetical protein
	FGSG_07214	GzHMG023	N/A													N/A								HMG
	FGSG_07409	GzHMG024	4	3	93.7193	yellow										4								HMG	serine/threonine-protein kinase BUR1
	FGSG_07947	GzHMG025	4	2	48.9103											4								HMG	conserved hypothetical protein
	FGSG_08890	MAT1-1-3	4	2	40.2631											4								HMG	hypothetical protein similar to mating type protein MAT1-1-3
	FGSG_08892	MAT1-1-1	4	2	42.2816											4								HMG	mating-type protein MAT-1
	FGSG_08893	MAT1-2-1	4	2	37.2263											4								HMG	hypothetical protein similar to mating type protein MAT1-2-1
	FGSG_09868	GzHMG029	1	2	51.4											0				Fung	CW	pH4		HMG	conserved hypothetical protein
	FGSG_10762	GzHMG030	N/A													N/A								HMG
	FGSG_10826	GzHMG031	4	2	44.3513											4								HMG	predicted protein
	FGSG_10944	GzHMG032	4	2	56.4342											4								HMG	hypothetical protein similar to nuclear condensin comple subunit Smc4
	FGSG_11834	GzHMG033	4	2	47.9956											4								HMG	predicted protein
	FGSG_12323	GzHMG034	4	2	44.7538											4								HMG	predicted protein
	FGSG_13004	GzHMG035	4	2	57.0517											4								HMG	conserved hypothetical protein
	FGSG_13150	GzHMG036	N/A													N/A								HMG
	FGSG_13929	GzHMG037	4	1	24.5071											4								HMG	predicted protein
	FGSG_01100	GzHOME001	4	2	44.3185											4								Homeobox	conserved hypothetical protein
	FGSG_05475	GzHOME002	4	2	44.6											2								Homeobox	conserved hypothetical protein
	FGSG_05477	GzHOME003	4	2	38.7664											4								Homeobox	conserved hypothetical protein
	FGSG_06812	GzHOME004	4	2	51.3669											4								Homeobox	conserved hypothetical protein
	FGSG_07097	FgHtf1	4	2	60.7683											4								Homeobox	conserved hypothetical protein
	FGSG_09019	GzHOME009	1	2	40.6525											2								Homeobox	hypothetical protein similar to homeoprotein
	FGSG_09043	GzHOME010	4	2	48.0704											4								C2H2 zinc finger	conserved hypothetical protein
	FGSG_09047	GzHOME011	4	2	52.077											4								C2H2 zinc finger	conserved hypothetical protein
	FGSG_09566	GzHOME012	4	2	57.8796											4								C2H2 zinc finger	conserved hypothetical protein
	FGSG_02718	GzHOMEL009	4	2	51.028											0								Homeodomain-like	conserved hypothetical protein
	FGSG_05264	GzHOMEL012	N/A													N/A								Homeodomain-like
	FGSG_06123	GzHOMEL013	N/A													N/A								Homeodomain-like
	FGSG_06966	GzHOMEL016	4	2	40.5306								SD			4								Homeodomain-like	predicted protein
	FGSG_07243	GzHOMEL018	4	3	78.5827								△HAT			4								Centromere protein B, DNA-binding region	conserved hypothetical protein
	FGSG_08753	GzHOMEL024	4	2	42.2482											4								Centromere protein B, DNA-binding region	conserved hypothetical protein
	FGSG_08954	GzHOMEL025	N/A													N/A								Homeodomain-like
	FGSG_08962	GzHOMEL026	N/A													N/A								Homeodomain-like
	FGSG_09228	GzHOMEL030	4	2	44.4996											4								Homeodomain-like	predicted protein
	FGSG_09791	GzHOMEL033	4	2	46.0063											4								Homeodomain-like	conserved hypothetical protein
	FGSG_10068	GzHOMEL035	4	1	32.0356											4								Homeodomain-like	SWR1-comple protein 4
	FGSG_10221	GzHOMEL036	4	2	43.4429											4								Homeodomain-like	hypothetical protein similar to DNA ecision repair protein Rad26L
	FGSG_13431	GzHOMEL040	N/A													N/A								Homeodomain-like
	FGSG_13911	GzHOMEL041	4	2	37.43											4								Homeodomain-like	predicted protein
	FGSG_06948	Gzscp	3	3	77.7546										NP, Vir, DON, MM	0	DDR							etc.	similar to Paf1 complex subunit/triple-helical DNA-binding protein Cdp1
	FGSG_08722	Gzsnd	4	2	49.6216											4								etc.	similar to transcription factor Snd1/p100
	FGSG_00930	GzSsu72	4	1	27.1991											2		Os			CW			etc.	similar to transcription/RNA-processing factor Ssu72
	FGSG_07458	GzLam001	4	2	42.193											4								Lambda repressor-like, DNA-binding	cyanate hydratase
	FGSG_10179	GzLam002	4	3	87.4304	yellow										4				Fung				Helix-turn-helix type 3	multiprotein-bridging factor 1
	FGSG_08696	GzMADS001	4	2	54.9784											4		Os			CW			MADS-box	hypothetical protein similar to MADS bo protein
	FGSG_09002	GzMADS002	4	2	42.765											4								MADS-box	conserved hypothetical protein
	FGSG_09339	GzMADS003	4	3	96.1194										NP, Vir, DON	2								MADS-box	conserved hypothetical protein
	FGSG_00318	MYT1	4	2	41.6841											4							pH11	Myb	conserved hypothetical protein
	FGSG_00324	MYT3	3	1	32.5978										NP, Vir, DON, MM	2		Os						Myb	conserved hypothetical protein
	FGSG_01274	GzMyb003	4	3	84.3583											4								Myb	hypothetical protein
	FGSG_01457	GzMyb004	4	2	46.3557											4								Myb	hypothetical protein
	FGSG_01915	GzFlbD	5	2	55.5823											4								Myb	conserved hypothetical protein
	FGSG_01925	GzMyb006	4	2	40.7956											4								Myb	conserved hypothetical protein
	FGSG_02538	GzMyb007	4	2	38.9052											4								Myb	hypothetical protein similar to MYB DNA-binding domain protein
	FGSG_02719	GzMyb008	4	3	81.2094											4				Fung	CW	pH4		Myb	hypothetical protein
	FGSG_04513	GzMyb009	N/A													N/A								Myb
	FGSG_05512	GzMyb010	N/A													N/A								Myb
	FGSG_06768	GzMyb011	4	2	39.7713											4								Myb	conserved hypothetical protein
	FGSG_07448	GzMyb012	4	2	55.0569											4								Myb	predicted protein
	FGSG_07546	MYT2	4	2	53.6874											2								Myb	conserved hypothetical protein
	FGSG_08713	GzMyb014	4	2	39.6182											4								Myb	conserved hypothetical protein
	FGSG_09807	GzMyb015	4	2	54.2378											4								Myb	pre-mRNA-splicing factor cef-1
	FGSG_10269	GzMyb016	2	3	85.1565											0								Myb	ISWI chromatin remodeling comple ATPase ISW1
	FGSG_12781	GzMyb017	3	2	51.932										NP, Vir, DON, MM	2								Myb	hypothetical protein similar to SAGA comple subunit Ada2
	FGSG_01167	GzMyb018	4	2	38.3079											4								Myb
	FGSG_01662	GzMyb019	4	2	38.1891											4								Myb
	FGSG_09992	GzNH001	2	N/A											NP, Vir, DON, MM	0								etc.	Neurospora crassa TFs homolog
	FGSG_01040	GzNH002	4	2	34.7088											4								etc.	Neurospora crassa TFs homolog
	FGSG_05588	GzNH003	4	2	42.9519											4								etc.	Neurospora crassa TFs homolog
	FGSG_04209	GzNEG001	4	2	37.6453											4								Negative transcriptional regulator	hypothetical protein similar to transcriptional regulator
	FGSG_07583	GzNEG002	4	2	39.1551											4								Negative transcriptional regulator	hypothetical protein similar to transcriptional regulator
	FGSG_00276	GzOB001	4	2	44.5759											4								Nucleic acid-binding, OB-fold	hypothetical protein similar to MPU1p
	FGSG_00504	GzOB002	N/A													N/A								Nucleic acid-binding, OB-fold
	FGSG_00671	GzOB003	4	1	31.0997											4								Nucleic acid-binding, OB-fold	40S ribosomal protein S11
	FGSG_00717	GzOB004	4	2	52.599											4								Nucleic acid-binding, OB-fold	mitochondrial import inner membrane translocase subunit TIM10
	FGSG_00875	GzOB005	4	2	34.4568											4								Nucleic acid-binding, OB-fold	hypothetical protein similar to lysyl-tRNA synthetase
	FGSG_01198	GzOB006	N/A													N/A								Nucleic acid-binding, OB-fold
	FGSG_01220	GzOB007	4	1	31.2673											4								Nucleic acid-binding, OB-fold	conserved hypothetical protein
	FGSG_01251	GzOB008	4	1	27.0756											4								Nucleic acid-binding, OB-fold	conserved hypothetical protein
	FGSG_01290	GzOB009	N/A													N/A								Nucleic acid-binding, OB-fold
	FGSG_01920	GzOB010	4	2	45.1744											4								Nucleic acid-binding, OB-fold	DNA replication licensing factor mcm3
	FGSG_01955	GzOB011	4	2	44.3994											4								Nucleic acid-binding, OB-fold	eukaryotic translation initiation factor 5A
	FGSG_01976	GzOB012	4	2	42.6796											4								Nucleic acid-binding, OB-fold	hypothetical protein similar to aspartate-tRNA ligase
	FGSG_02470	GzOB013	N/A													N/A								Nucleic acid-binding, OB-fold
	FGSG_02622	GzOB014	N/A													N/A								Nucleic acid-binding, OB-fold
	FGSG_03695	GzOB015	4	2	38.1465											4								Nucleic acid-binding, OB-fold	hypothetical protein similar to endoglucanase IV precursor
	FGSG_04169	GzOB016	4	2	45.4727											4								Nucleic acid-binding, OB-fold	conserved hypothetical protein
	FGSG_04273	GzOB017	4	2	44.4812											4								Nucleic acid-binding, OB-fold	hypothetical protein similar to DNA-directed RNA polymerases i
	FGSG_04554	GzOB018	4	2	41.2548											4								Nucleic acid-binding, OB-fold	conserved hypothetical protein
	FGSG_05002	GzOB019	4	2	42.7522											4								Nucleic acid-binding, OB-fold	ATP-dependent RNA helicase DH8
	FGSG_05012	GzOB020	4	2	42.506											4								Nucleic acid-binding, OB-fold	hypothetical protein similar to Arc1p protein
	FGSG_06110	GzOB021	4	2	45.4818								△RNAi			4								Nucleic acid-binding, OB-fold	endoglucanase-4 precursor
	FGSG_06220	GzOB022	4	2	37.5564											4								Nucleic acid-binding, OB-fold	eukaryotic translation initiation factor 2 subunit alpha
	FGSG_06777	GzOB023	4	2	37.4024											4								Nucleic acid-binding, OB-fold	DNA replication licensing factor mcm5
	FGSG_06931	GzOB024	4	2	41.9293											4								Nucleic acid-binding, OB-fold	60S ribosomal protein L2
	FGSG_06951	GzOB025	4	2	36.4198											4								Nucleic acid-binding, OB-fold	mRNA capping enzyme subunit alpha
	FGSG_07082	GzOB026	4	2	43.1356											4								Nucleic acid-binding, OB-fold	predicted protein
	FGSG_07105	GzOB027	4	2	42.4832											4								Nucleic acid-binding, OB-fold	DNA replication licensing factor mcm7
	FGSG_07269	GzOB028	N/A													N/A								Nucleic acid-binding, OB-fold
	FGSG_08645	GzOB029	4	2	37.0759											4								Nucleic acid-binding, OB-fold	conserved hypothetical protein
	FGSG_08655	GzOB030	N/A													N/A								Nucleic acid-binding, OB-fold
	FGSG_08737	Hex1	4	2	50.6356								△HAT		NP, Vir	4								Nucleic acid-binding, OB-fold	Woronin body major protein precursor
	FGSG_08750	GzOB032	4	2	39.9821											4								Nucleic acid-binding, OB-fold	conserved hypothetical protein
	FGSG_08756	GzOB033	4	3	82.6738	yellow										4								Nucleic acid-binding, OB-fold	conserved hypothetical protein
	FGSG_08761	GzOB034	4	2	41.0033											4								Nucleic acid-binding, OB-fold	lysyl-tRNA synthetase
	FGSG_08865	GzOB035	4	1	30.4323											4								Nucleic acid-binding, OB-fold	asparaginyl-tRNA synthetase
	FGSG_09000	GzOB036	4	2	36.2763											4								Nucleic acid-binding, OB-fold	conserved hypothetical protein
	FGSG_09406	GzOB037	4	2	54.0553											4								Nucleic acid-binding, OB-fold	conserved hypothetical protein
	FGSG_09654	GzOB038	2	2	36.6732											4								Nucleic acid-binding, OB-fold	hypothetical protein similar to protein G6G8.9
	FGSG_09662	GzOB039	4	2	58.0725											4								Nucleic acid-binding, OB-fold	30S ribosomal protein S12
	FGSG_09852	GzOB041	4	2	41.42											4								Nucleic acid-binding, OB-fold	conserved hypothetical protein
	FGSG_09904	GzOB042	4	2	40.6718											4				Fung				Nucleic acid-binding, OB-fold	transcription elongation factor SPT6
	FGSG_09991	GzOB043	4	2	41.3834											4								Nucleic acid-binding, OB-fold	glutamate-cysteine ligase
	FGSG_10122	GzOB044	4	2	41.2082											4								Nucleic acid-binding, OB-fold	hypothetical protein similar to replication factor A 1
	FGSG_10733	GzOB045	4	2	46.3384											4								Nucleic acid-binding, OB-fold	conserved hypothetical protein
	FGSG_10797	GzOB046	4	2	44.772											4								Nucleic acid-binding, OB-fold	conserved hypothetical protein
	FGSG_13120	GzOB047	2	2	44.7712										NP, Vir, DON, MM	0								Nucleic acid-binding, OB-fold	hypothetical protein similar to eosomal core protein CSL4
	FGSG_13818	GzOB048	4	2	39.4843											4								Nucleic acid-binding, OB-fold	conserved hypothetical protein
	FGSG_00350	GzP53L001	4	2	40.673											4								p53-like transcription factor	conserved hypothetical protein
	FGSG_03874	GzP53L002	4	2	51.6546											4		Os					pH11	p53-like transcription factor	sodium sensitive 1
	FGSG_07157	GzP53L003	3	3	78.7618											4								NDT80/PhoG like DNA-binding	hypothetical protein similar to VIB-1
	FGSG_08397	GzP53L004	4	2	45.3192											4								NDT80/PhoG like DNA-binding	conserved hypothetical protein
	FGSG_09709	GzP53L005	4	2	43.6633											4								NDT80/PhoG like DNA-binding	conserved hypothetical protein
	FGSG_10985	GzP53L006	4	2	45.1699								△RNAi			4								p53-like transcription factor	predicted protein
	FGSG_06279	GzSART1	4	2	43.5893											4								SART1	conserved hypothetical protein
	FGSG_09837	GzSGT1	4	2	46.6071											4								SGT1	conserved hypothetical protein
	FGSG_01929	GzssDB001	4	3	97.5895											4								ssDNA-binding transcriptional regulator	hypothetical protein similar to DNA mismatch repair protein Pms1
	FGSG_10186	GzssDB002	4	2	41.6113											4								ssDNA-binding transcriptional regulator	conserved hypothetical protein
	FGSG_00420	GzFET5	4	N/A												4								etc.	transcription factor FET5
	FGSG_00934	GzJUM001	4	2	42.8751											4								Transcription factor jumonji	predicted protein
	FGSG_01558	GzJUM002	4	2	41.5647											4								Transcription factor jumonji	conserved hypothetical protein
	FGSG_05855	GzRUM1	4	2	39.7363											4								Transcription factor jumonji	hypothetical protein similar to PHD transcription factor Rum1
	FGSG_06840	GzJUM004	4	2	38.7208											4								Transcription factor jumonji	conserved hypothetical protein
	FGSG_13613	GzJUM005	4	2	50.5734											4								Transcription factor jumonji	conserved hypothetical protein
	FGSG_13928	GzJUM006	4	2	40.6642											4								Transcription factor jumonji	hypothetical protein similar to JmjC domain protein
	FGSG_08981	GzOpi	4	2	35.6772											4				Fung				etc.	Transcription factor Opi1
	FGSG_00902	GzTF2S001	4	2	47.4501											4							pH11	Transcription factor TFIIS	conserved hypothetical protein
	FGSG_08551	GzTF2S002	4	2	43.3825											4								Transcription factor TFIIS	DNA-directed RNA polymerases III 12.5 kDa polypeptide
	FGSG_01665	FgFSR1	2	N/A											NP, Vir, DON, MM	0						pH4		WD repeat	striatin Pro11
	FGSG_00502	GzWing001	4	2	51.1934											4								Winged helix repressor DNA-binding	vacuolar transporter chaperone 4
	FGSG_00778	GzWing002	4	2	38.2763											4								Winged helix repressor DNA-binding	conserved hypothetical protein
	FGSG_00946	GzWing003	4	2	43.8001											4								Winged helix repressor DNA-binding	conserved hypothetical protein
	FGSG_01030	GzWing004	4	2	52.8675											4								Winged helix repressor DNA-binding	conserved hypothetical protein
	FGSG_01116	GzWing005	4	2	40.4594											4								Winged helix repressor DNA-binding	conserved hypothetical protein
	FGSG_01689	GzWing006	4	2	41.5995											4								Winged helix repressor DNA-binding	hypothetical protein similar to MGMT family protein
	FGSG_02615	GzWing007	4	2	33.4177											4								Winged helix repressor DNA-binding	conserved hypothetical protein
	FGSG_03597	FgFlbB	4	2	45.3193											4								Winged helix repressor DNA-binding	conserved hypothetical protein
	FGSG_04254	GzWing009	N/A													N/A								Winged helix repressor DNA-binding
	FGSG_05388	GzWing010	4	2	44.2646											4								Winged helix repressor DNA-binding	hypothetical protein similar to FKH1
	FGSG_05520	GzWing011	4	2	44.2742											0	DDR	Os			CW			Winged helix repressor DNA-binding	Related to human cullin homolog 4A
	FGSG_05949	GzWing012	4	2	46.8732											4								Winged helix repressor DNA-binding	conserved hypothetical protein
	FGSG_06228	FgFlbA	4	2	45.4149										NP, Vir, DON	6		Os	ROS	Fung	CW	pH4		Winged helix repressor DNA-binding	developmental regulator flbA , regulator of G-protein signaling
	FGSG_06359	FgSKN7 (FgRrg-2)	3	2	52.7764								Oxi			4								Winged helix repressor DNA-binding	conserved hypothetical protein
	FGSG_06944	GzWing015	3	2	37.5389											4								Winged helix repressor DNA-binding
	FGSG_07420	GzRFX1	3	3	76.0146	very weak growth of myceila										2	DDR		ROS					Winged helix repressor DNA-binding	conserved hypothetical protein
	FGSG_07433	GzWing017	3	2	39.107											4				Fung			pH11	Winged helix repressor DNA-binding	conserved hypothetical protein
	FGSG_08481	GzWing018	3	2	39.1309											0		Os	ROS	Fung	CW			Winged helix repressor DNA-binding	hypothetical protein similar to RhoGAP and Fes/CIP4 domain protein
	FGSG_08572	GzWing019	1	3	67.1835										NP, Vir, DON, MM	0								Winged helix repressor DNA-binding	hypothetical protein similar to protein mst2
	FGSG_08719	GzWing020	3	2	62.7965										NP, Vir, DON, MM	0		Os	ROS	Fung	CW	pH4	pH11	Winged helix repressor DNA-binding	hypothetical protein similar to myosin type II heavy chain
	FGSG_09724	GzWing021	4	2	48.288											4								Winged helix repressor DNA-binding	conserved hypothetical protein
	FGSG_10017	GzWing022	N/A													N/A								Winged helix repressor DNA-binding
	FGSG_10331	GzWing023	4	2	41.3944											4								Winged helix repressor DNA-binding	conserved hypothetical protein
	FGSG_10800	GzWing024	4	3	84.31											4								Winged helix repressor DNA-binding	hypothetical protein
	FGSG_10886	GzWing026	4	2	50.8488											4								Winged helix repressor DNA-binding	hypothetical protein similar to RING-2
	FGSG_11826	GzWing027	4	2	41.2051								SD			4								Winged helix repressor DNA-binding	predicted protein
	FGSG_13640	GzWing028	4	2	48.7748											4								Winged helix repressor DNA-binding	conserved hypothetical protein
	FGSG_02520	GzYL	N/A													N/A
	FGSG_02288	GzCCCH001	4	2	44.6148								△HAT			4								Zinc finger, CCCH-type
	FGSG_06860	GzCCCH002	4	2	39.2571											4								Zinc finger, CCCH-type
	FGSG_10829	GzCCCH003	4	3	63.3183											4								Zinc finger, CCCH-type
	FGSG_11696	GzCCCH004	4	2	47.2597											4								Zinc finger, CCCH-type
	FGSG_01984	GzCCHC001	4	2	40.6862											4								Zinc finger, CCHC-type	predicted protein
	FGSG_02080	GzCCHC002	4	2	44.9889											4								Zinc finger, CCHC-type	conserved hypothetical protein
	FGSG_02646	GzCCHC003	4	2	39.2836											4								Zinc finger, CCHC-type	conserved hypothetical protein
	FGSG_05280	GzCCHC004	4	2	45.7439											4								Zinc finger, CCHC-type	hypothetical protein
	FGSG_06910	GzCCHC005	4	2	34.3917											4								Zinc finger, CCHC-type	predicted protein
	FGSG_08897	GzCCHC006	4	2	36.5004											4								Zinc finger, CCHC-type	pre-mRNA-splicing factor SLU7
	FGSG_09892	GzCCHC007	4	2	43.7496											4								Zinc finger, CCHC-type	hypothetical protein similar to retinoblastoma-binding protein
	FGSG_10143	GzCCHC008	4	2	52.02											4								Zinc finger, CCHC-type	conserved hypothetical protein
	FGSG_10277	GzCCHC009	4	2	39.2679											4								Zinc finger, CCHC-type	predicted protein
	FGSG_10286	GzCCHC010	4	2	42.8339											4								Zinc finger, CCHC-type	conserved hypothetical protein
	FGSG_10716	GzCCHC011	1	2	42.8344										NP, Vir, DON, MM	0								Zinc finger, CCHC-type	5'-3' exoribonuclease 2
	FGSG_12977	GzCCHC012	4	2	38.8748											4								Zinc finger, CCHC-type	predicted protein
	FGSG_01411	GzDHHC001	4	2	48.3555											4								Zinc finger, DHHC-type	palmitoyltransferase PFA4
	FGSG_05896	GzDHHC002	4	2	48.3544											4							pH11	Zinc finger, DHHC-type	palmitoyltransferase PFA3
	FGSG_06542	GzDHHC003	4	2	38.8099										NP	4			ROS					Zinc finger, DHHC-type	palmitoyltransferase AKR1
	FGSG_08531	GzDHHC004	4	2	36.354											4								Zinc finger, DHHC-type	palmitoyltransferase ERF2
	FGSG_08915	GzDHHC005	4	2	49.9693											4								Zinc finger, DHHC-type	palmitoyltransferase PFA5
	FGSG_05110	GzGRF	4	2	47.2922											4								Zinc finger, GRF-type	hypothetical protein similar to GRF zinc finger domain protein
	FGSG_08455	GzMIZ001	4	3	91.9279											4								Zinc finger, MIZ-type	conserved hypothetical protein
	FGSG_10015	GzMIZ002	4	2	46.0641											4								Zinc finger, MIZ-type	conserved hypothetical protein
	FGSG_02130	GzNF001	4	2	42.1853								△HAT			4								Zinc finger, NF-1-type	conserved hypothetical protein
	FGSG_07076	GzNF002	4	2	43.0652											4								Zinc finger, NF-1-type	conserved hypothetical protein
	FGSG_04221	GzRad001	N/A													N/A								Zinc finger, Rad18-type putative	predicted protein
	FGSG_04258	GzRad002	4	2	34.6919											4	DDR							Zinc finger, Rad18-type putative	Probable DNA repair protein UVS-2, homolog of Saccharomyces cerevisiae RAD18
	FGSG_12264	GzRad003	4	N/A												4								Zinc finger, Rad18-type putative	hypothetical protein similar to AAA family ATPase
	FGSG_12006	GzZC001	4	2	52.8663											4								Zn2Cys6	conserved hypothetical protein
	FGSG_12002	GzZC002	4	2	45.1495											4								Zn2Cys6	conserved hypothetical protein
	FGSG_08831	GzZC003	4	2	47.9637											4								Zn2Cys6	conserved hypothetical protein
	FGSG_10030	GzZC004	4	3	82.3407	yellow										4								Zn2Cys6	conserved hypothetical protein
	FGSG_11624	GzZC005	4	2	41.5245											4								Zn2Cys6	conserved hypothetical protein
	FGSG_09945	GzZC006	4	2	43.3315											4								Zn2Cys6	predicted protein
	FGSG_09524	GzZC007	4	2	33.4427											2								Zn2Cys6	conserved hypothetical protein
	FGSG_09349	GzZC008	4	2	45.5931											2								Zn2Cys6	conserved hypothetical protein
	FGSG_11520	GzZC009	4	2	37.4962											4								Zn2Cys6	conserved hypothetical protein
	FGSG_10977	GzZC010	4	2	35.0969											4								Zn2Cys6	conserved hypothetical protein
	FGSG_11051	GzZC011	4	2	40.46											4								Zn2Cys6	conserved hypothetical protein
	FGSG_11462	GzZC012	4	2	44.7563											4								Zn2Cys6	conserved hypothetical protein
	FGSG_10891	GzZC013	4	2	52.3648											4								Zn2Cys6
	FGSG_04680	GzZC014	4	2	62.17											4								Zn2Cys6	conserved hypothetical protein
	FGSG_04666	GzZC015	4	2	45.0209											4								Zn2Cys6	conserved hypothetical protein
	FGSG_04496	GzZC016	4	2	36.106											4								Zn2Cys6	predicted protein
	FGSG_07575	GzZC017	4	2	42.9045											4								Zn2Cys6	predicted protein
	FGSG_07568	GzZC018	4	2	36.2647											4								Zn2Cys6	conserved hypothetical protein
	FGSG_05926	GzZC019	4	3	77.4	yellow										4								Zn2Cys6	conserved hypothetical protein
	FGSG_03924	GzZC020	4	2	36.273											4								Zn2Cys6	conserved hypothetical protein
	FGSG_03873	GzZC021	4	3	88.9125											4								Zn2Cys6	predicted protein
	FGSG_04170	GzZC022	4	2	42.6585											4								Zn2Cys6	conserved hypothetical protein
	FGSG_05827	GzZC023	4	2	45.317											4								Zn2Cys6	conserved hypothetical protein
	FGSG_06516	GzZC024	4	2	40.3126											4								Zn2Cys6	conserved hypothetical protein
	FGSG_03606	GzZC025	4	2	42.3148											4								Zn2Cys6	conserved hypothetical protein
	FGSG_02150	GzZC026	4	N/A												4								Zn2Cys6
	FGSG_05309	GzZC027	4	2	41.0888											4								Zn2Cys6	hypothetical protein similar to Zn(II)2Cys6 transcription factor
	FGSG_02825	GzZC028	4	2	39.8033											4								Zn2Cys6	conserved hypothetical protein
	FGSG_06448	GzZC029	N/A													N/A								Zn2Cys6
	FGSG_06380	GzZC030	4	N/A												4								Zn2Cys6	conserved hypothetical protein
	FGSG_04782	GzZC031	4	2	55.621								△RNAi			4								Zn2Cys6	predicted protein
	FGSG_00153	GzZC032	4	N/A												4								Zn2Cys6	conserved hypothetical protein
	FGSG_13652	GzZC033	4	2	53.0137	white fluffy aerial mycelia										4								Zn2Cys6	predicted protein
	FGSG_13625	GzZC034	4	3	73.3102	yellow										4								Zn2Cys6	conserved hypothetical protein
	FGSG_13386	GzZC035	4	2	38.2247											4								Zn2Cys6	hypothetical protein
	FGSG_13344	GzZC036	4	1	30.7509	white fluffy aerial mycelia										4								Zn2Cys6	conserved hypothetical protein
	FGSG_13098	GzZC037	4	2	41.1614											4								Zn2Cys6	predicted protein
	FGSG_13008	GzZC038	4	2	35.4886											4								Zn2Cys6	conserved hypothetical protein
	FGSG_13830	GzZC039	4	1	31.5254											4								Zn2Cys6	conserved hypothetical protein
	FGSG_13828	GzZC040	4	1	19.432											4								Zn2Cys6	conserved hypothetical protein
	FGSG_13457	GzZC041	4	2	39.0517											4								Zn2Cys6	predicted protein
	FGSG_12173	GzZC042	4	2	58.7963											4								Zn2Cys6	conserved hypothetical protein
	FGSG_12134	GzZC043	4	2	38.8425											4								Zn2Cys6	predicted protein
	FGSG_12094	GzZC044	4	N/A												4								Zn2Cys6	predicted protein
	FGSG_12398	GzZC045	4	2	58.5889											4								Zn2Cys6	conserved hypothetical protein
	FGSG_11996	GzZC046	4	2	40.9415											4								Zn2Cys6	conserved hypothetical protein
	FGSG_12385	GzZC047	4	2	42.2262											4								Zn2Cys6	conserved hypothetical protein
	FGSG_12660	GzZC048	4	2	46.0992											4								Zn2Cys6	predicted protein
	FGSG_12611	GzZC049	4	3	83.0863											4								Zn2Cys6	predicted protein
	FGSG_12597	GzZC050	4	2	53.0098	white fluffy aerial mycelia							△RNAi			4								Zn2Cys6	conserved hypothetical protein
	FGSG_11720	GzZC051	4	2	55.7248	yellow										4								Zn2Cys6	conserved hypothetical protein
	FGSG_11709	GzZC052	4	2	47.6534											4								Zn2Cys6	conserved hypothetical protein
	FGSG_11686	GzZC053	4	2	38.0132											4								Zn2Cys6	predicted protein
	FGSG_12742	GzZC054	4	3	77.6283											4								Zn2Cys6	conserved hypothetical protein
	FGSG_12714	GzZC055	4	2	42.8647											4								Zn2Cys6	transcriptional activator lnR
	FGSG_12703	GzZC056	4	2	37.2792											4								Zn2Cys6	conserved hypothetical protein
	FGSG_12798	GzZC057	4	2	47.0741											4								Zn2Cys6	conserved hypothetical protein
	FGSG_13172	GzZC058	4	2	34.2096											4								Zn2Cys6	predicted protein
	FGSG_08861	GzZC059	4	1	31.193											4								Zn2Cys6	predicted protein
	FGSG_08808	GzZC060	4	N/A												4								Zn2Cys6	conserved hypothetical protein
	FGSG_08791	GzZC061	4	2	37.6349											4								Zn2Cys6	hypothetical protein similar to C6 zinc finger protein
	FGSG_12584	GzZC062	N/A													N/A								Zn2Cys6
	FGSG_12528	GzZC063	4	2	44.4445											4								Zn2Cys6	predicted protein
	FGSG_11672	GzZC064	4	2	38.3247											4								Zn2Cys6	predicted protein
	FGSG_11654	GzZC065	4	2	40.3268											4								Zn2Cys6	conserved hypothetical protein
	FGSG_09726	GzZC066	4	2	36.9459											4								Zn2Cys6	conserved hypothetical protein
	FGSG_09921	GzZC067	4	2	34.0389											4								Zn2Cys6	transcriptional activator protein acu-15
	FGSG_09884	GzZC068	4	2	33.6333											4								Zn2Cys6	hypothetical protein similar to C6 transcription factor
	FGSG_10536	GzZC069	4	2	37.5446											4								Zn2Cys6	conserved hypothetical protein
	FGSG_10505	GzZC070	4	1	32.6442											4								Zn2Cys6	conserved hypothetical protein
	FGSG_11821	GzZC071	4	2	37.6004											4								Zn2Cys6	conserved hypothetical protein
	FGSG_09594	GzZC072	4	2	43.5331											4								Zn2Cys6	conserved hypothetical protein
	FGSG_09178	GzZC073	4	2	43.0211											4								Zn2Cys6	conserved hypothetical protein
	FGSG_09147	GzZC074	4	2	41.045											4								Zn2Cys6	conserved hypothetical protein
	FGSG_09123	GzZC075	4	2	52.2121											4								Zn2Cys6	conserved hypothetical protein
	FGSG_09111	GzZC076	4	2	35.0184								△RNAi			4								Zn2Cys6	conserved hypothetical protein
	FGSG_09065	GzZC077	4	3	86.8234											4								Zn2Cys6	conserved hypothetical protein
	FGSG_09014	GzZC078	4	2	36.2642											4								Zn2Cys6	conserved hypothetical protein
	FGSG_09333	GzZC079	4	2	40.9413											4								Zn2Cys6	protein RDR1
	FGSG_09331	GzZC080	4	2	33.5249											4								Zn2Cys6	conserved hypothetical protein
	FGSG_10458	GzZC081	N/A													N/A								Zn2Cys6
	FGSG_10429	GzZC082	4	2	35.5341											4								Zn2Cys6	conserved hypothetical protein
	FGSG_00568	GzZC083	4	2	44.7495											4				Fung				Zn2Cys6
	FGSG_08972	GzZC084	4	2	44.8541											4								Zn2Cys6	predicted protein
	FGSG_08930	GzZC085	4	2	38.7332											4								Zn2Cys6	conserved hypothetical protein
	FGSG_08924	GzZC086	3	1	31.5277								Oxi			4				Fung				Zn2Cys6	conserved hypothetical protein
	FGSG_10069	GzZC087	3	3	94.8316								△HAT		NP, Vir, MM	4								Zn2Cys6	conserved hypothetical protein
	FGSG_11561	GzZC088	4	2	40.9513											4								Zn2Cys6	hypothetical protein similar to C6 zinc finger protein
	FGSG_11551	GzZC089	N/A													N/A								Zn2Cys6
	FGSG_12244	GzZC090	4	1	31.182											4								Zn2Cys6	conserved hypothetical protein
	FGSG_10364	GzZC091	4	2	38.3213											4								Zn2Cys6	conserved hypothetical protein
	FGSG_11093	GzZC092	4	2	41.1427											4								Zn2Cys6	conserved hypothetical protein
	FGSG_11218	GzZC093	4	2	47.8492											4								Zn2Cys6	conserved hypothetical protein
	FGSG_11186	GzZC094	4	2	40.9583								△RNAi			4								Zn2Cys6	predicted protein
	FGSG_11271	GzZC095	4	2	61.7355											4								Zn2Cys6	conserved hypothetical protein
	FGSG_11262	GzZC096	4	2	39.5396											4								Zn2Cys6	conserved hypothetical protein
	FGSG_11356	GzZC097	N/A													N/A								Zn2Cys6
	FGSG_10914	GzZC098	4	2	39.172											4								Zn2Cys6	conserved hypothetical protein
	FGSG_10895	GzZC099	4	2	35.436											4								Zn2Cys6	conserved hypothetical protein
	FGSG_10812	GzZC100	4	1	31.9497											4								Zn2Cys6	conserved hypothetical protein
	FGSG_10674	GzZC101	4	2	36.559											4								Zn2Cys6	predicted protein
	FGSG_10660	GzZC102	4	1	27.007											4								Zn2Cys6	hypothetical protein similar to RING-4
	FGSG_10639	GzZC103	4	2	35.6755											4								Zn2Cys6	conserved hypothetical protein
	FGSG_08392	GzZC104	4	2	42.6187											4								Zn2Cys6	conserved hypothetical protein
	FGSG_08380	GzZC105	N/A													N/A								Zn2Cys6
	FGSG_08321	GzZC106	4	2	53.4811											4								Zn2Cys6	conserved hypothetical protein
	FGSG_08369	GzZC107	4	2	41.8682											4								Zn2Cys6	conserved hypothetical protein
	FGSG_08769	GzZC108	2	3	78.0082										NP, Vir, DON, MM	0								Zn2Cys6	conserved hypothetical protein
	FGSG_08626	GzZC109	4	2	42.6637											4								Zn2Cys6	conserved hypothetical protein
	FGSG_07265	GzZC110	4	2	48.0134											4								Zn2Cys6	conserved hypothetical protein
	FGSG_07198	GzZC111	4	2	36.016											4								Zn2Cys6	conserved hypothetical protein
	FGSG_07192	GzZC112	4	2	36.7782											4								Zn2Cys6	cutinase transcription factor 1 beta
	FGSG_07177	GzZC113	4	2	34.6535											4					CW			Zn2Cys6	conserved hypothetical protein
	FGSG_00967	GzZC114	4	2	45.559											4								Zn2Cys6	conserved hypothetical protein
	FGSG_01936	GzZC115	4	2	40.2261											4								Zn2Cys6	cutinase transcription factor 1 alpha
	FGSG_08182	GzZC116	4	2	41.3068											4								Zn2Cys6	predicted protein
	FGSG_08179	GzZC117	4	2	39.7163											4								Zn2Cys6	conserved hypothetical protein
	FGSG_08038	GzZC118	4	2	50.9092											4								Zn2Cys6	conserved hypothetical protein
	FGSG_08034	GzZC119	4	2	39.55											4								Zn2Cys6	conserved hypothetical protein
	FGSG_08028	GzZC120	4	2	43.5036								△RNAi			4								Zn2Cys6	conserved hypothetical protein
	FGSG_07927	GzZC121	4	2	50.4111											4		Os	ROS					Zn2Cys6	predicted protein
	FGSG_07924	GzZC122	N/A													N/A								Zn2Cys6
	FGSG_02277	GzZC123	4	2	44.5209											4								Zn2Cys6	conserved hypothetical protein
	FGSG_02215	GzZC124	N/A													N/A								Zn2Cys6
	FGSG_07884	GzZC125	4	2	33.285											4								Zn2Cys6	conserved hypothetical protein
	FGSG_07827	GzZC126	4	2	40.3325											4								Zn2Cys6	conserved hypothetical protein
	FGSG_08135	GzZC127	4	2	43.9712											4								Zn2Cys6	conserved hypothetical protein
	FGSG_08080	GzZC128	4	2	40.9684											4								Zn2Cys6	predicted protein
	FGSG_08064	GzZC129	N/A													N/A								Zn2Cys6
	FGSG_04643	GzZC130	4	2	35.5639											4								Zn2Cys6	conserved hypothetical protein
	FGSG_06810	GzZC131	4	2	38.5347											4								Zn2Cys6	hypothetical protein similar to fungal specific transcription factor domain protein
	FGSG_04581	ZEAR	4	2	43.554											4								Zn2Cys6	predicted protein
	FGSG_12927	GzZC133	4	2	41.1979											4								Zn2Cys6
	FGSG_12813	GzZC134	4	2	41.0781											4								Zn2Cys6	predicted protein
	FGSG_13135	GzZC135	4	2	40.172											4								Zn2Cys6	hypothetical protein similar to C6 transcription factor
	FGSG_08828	GzZC136	4	2	42.3661											4								Zn2Cys6	hypothetical protein similar to C6 transcription factor
	FGSG_10533	GzZC137	4	2	52.3556											4								Zn2Cys6	conserved hypothetical protein
	FGSG_09075	GzZC138	4	2	37.8114											4								Zn2Cys6	conserved hypothetical protein
	FGSG_09371	GzZC139	4	2	40.3339											4								Zn2Cys6	conserved hypothetical protein
	FGSG_09328	GzZC140	4	1	32.1467											4								Zn2Cys6	predicted protein
	FGSG_10980	GzZC141	4	2	43.9026											4								Zn2Cys6	conserved hypothetical protein
	FGSG_11124	GzZC142	4	2	37.5028											4								Zn2Cys6	predicted protein
	FGSG_11216	GzZC143	4	2	47.2563											4								Zn2Cys6	conserved hypothetical protein
	FGSG_10627	GzZC144	N/A													N/A								Zn2Cys6
	FGSG_07889	GzZC145	4	2	50.037											4								Zn2Cys6	conserved hypothetical protein
	FGSG_03353	GzZC146	4	2	37.7509											4								Zn2Cys6	conserved hypothetical protein
	FGSG_03068	GzZC147	4	2	41.5861											4								Zn2Cys6	conserved hypothetical protein
	FGSG_04203	GzZC148	4	2	36.6587											4								Zn2Cys6	conserved hypothetical protein
	FGSG_05772	GzZC149	4	2	38.7675											4								Zn2Cys6	conserved hypothetical protein
	FGSG_03649	GzZC150	4	2	34.3301											4								Zn2Cys6	conserved hypothetical protein
	FGSG_02445	GzZC151	4	2	38.3332											4								Zn2Cys6	conserved hypothetical protein
	FGSG_02431	GzZC152	4	2	35.5147											4								Zn2Cys6	conserved hypothetical protein
	FGSG_02787	GzZC153	4	2	47.0907											4								Zn2Cys6	conserved hypothetical protein
	FGSG_01731	GzZC154	4	2	39.6475											4								Zn2Cys6	predicted protein
	FGSG_06460	GzZC155	4	2	36.0747											4								Zn2Cys6	conserved hypothetical protein
	FGSG_03783	GzZC156	4	2	33.8431											4								Zn2Cys6	conserved hypothetical protein
	FGSG_00813	GzZC157	4	2	42.4354											4								Zn2Cys6	hypothetical protein similar to C6 transcription factor
	FGSG_11891	GzZC158	4	2	37.3722											4								Zn2Cys6	conserved hypothetical protein
	FGSG_12631	GzZC159	4	2	37.979											4								Zn2Cys6	conserved hypothetical protein
	FGSG_11683	GzZC160	4	2	46.4961											4								Zn2Cys6	predicted protein
	FGSG_12729	GzZC161	4	2	34.5828											4								Zn2Cys6	conserved hypothetical protein
	FGSG_09464	GzZC162	4	2	45.2527											4		Os			CW	pH4		Zn2Cys6	conserved hypothetical protein
	FGSG_09177	GzZC163	4	2	35.7521											4								Zn2Cys6	predicted protein
	FGSG_10266	GzZC164	4	2	42.343											4								Zn2Cys6	conserved hypothetical protein
	FGSG_09080	GzZC165	4	2	44.024											4								Zn2Cys6	conserved hypothetical protein
	FGSG_09064	GzZC166	N/A													N/A								Zn2Cys6
	FGSG_10468	GzZC167	4	2	41.5364											4								Zn2Cys6	conserved hypothetical protein
	FGSG_09225	GzZC168	4	2	45.6949											4								Zn2Cys6	predicted protein
	FGSG_10070	GzZC169	4	2	42.0786											4								Zn2Cys6	conserved hypothetical protein
	FGSG_12282	GzZC170	4	2	39.5346											4								Zn2Cys6	predicted protein
	FGSG_11247	GzZC171	4	2	39.1058											4								Zn2Cys6	conserved hypothetical protein
	FGSG_11364	GzZC172	4	2	39.7738											4							pH11	Zn2Cys6	conserved hypothetical protein
	FGSG_11358	GzZC173	4	2	40.4673								△RNAi			4								Zn2Cys6	predicted protein
	FGSG_11355	GzZC174	4	2	40.7133											4								Zn2Cys6	predicted protein
	FGSG_08349	GzZC175	4	2	40.6151											4								Zn2Cys6	conserved hypothetical protein
	FGSG_08010	GzZC176	4	2	42.2741											4								Zn2Cys6	conserved hypothetical protein
	FGSG_04683	GzZC177	4	2	46.791											4								Zn2Cys6	conserved hypothetical protein
	FGSG_04671	GzZC178	4	2	60.2213											4								Zn2Cys6	predicted protein
	FGSG_14003	GzZC179	4	1	30.456											4								Zn2Cys6	conserved hypothetical protein
	FGSG_13455	GzZC180	4	2	42.6406											4								Zn2Cys6	conserved hypothetical protein
	FGSG_12115	GzZC181	4	2	36.7075											4								Zn2Cys6	conserved hypothetical protein
	FGSG_04576	GzZC182	4	2	39.6168											4								Zn2Cys6	predicted protein
	FGSG_04480	GzZC183	4	2	42.1398								SD			4								Zn2Cys6	conserved hypothetical protein
	FGSG_01853	GzZC184	4	2	40.1738											4								Zn2Cys6	conserved hypothetical protein
	FGSG_01795	GzZC185	4	2	40.102											4								Zn2Cys6	conserved hypothetical protein
	FGSG_07638	GzZC186	N/A													N/A								Zn2Cys6
	FGSG_07609	GzZC187	N/A													N/A								Zn2Cys6
	FGSG_07604	GzZC188	4	2	53.6972											4								Zn2Cys6	conserved hypothetical protein
	FGSG_07591	GzZC189	4	2	43.9469											4								Zn2Cys6	conserved hypothetical protein
	FGSG_07589	GzZC190	4	2	39.8402											4								Zn2Cys6	predicted protein
	FGSG_01515	GzZC191	4	2	40.9496											4								Zn2Cys6	conserved hypothetical protein
	FGSG_05958	GzZC192	4	2	40.8688											4								Zn2Cys6	conserved hypothetical protein
	FGSG_05925	GzZC193	4	1	27.567											4								Zn2Cys6	conserved hypothetical protein
	FGSG_03929	GzZC194	4	2	47.8513											4								Zn2Cys6	conserved hypothetical protein
	FGSG_03919	GzZC195	4	2	40.0729											4								Zn2Cys6	conserved hypothetical protein
	FGSG_03912	GzZC196	4	1	29.4492								△RNAi			4								Zn2Cys6	conserved hypothetical protein
	FGSG_03892	GzZC197	4	3	80.7031	yellow							△RNAi			4								Zn2Cys6	hypothetical protein similar to RING-3
	FGSG_03878	GzZC198	4	2	44.4281											4								Zn2Cys6	conserved hypothetical protein
	FGSG_03861	GzZC199	4	2	40.4108											4								Zn2Cys6	conserved hypothetical protein
	FGSG_03857	GzZC200	4	2	46.7454											4								Zn2Cys6	predicted protein
	FGSG_07693	GzZC201	4	2	37.971											4								Zn2Cys6	conserved hypothetical protein
	FGSG_03415	GzZC202	4	2	50.0795											4								Zn2Cys6	hypothetical protein similar to fungal specific transcription factor domain containing protein
	FGSG_03399	GzZC203	4	3	75.4168											4								Zn2Cys6	predicted protein
	FGSG_03390	GzZC204	4	3	71.6025											4								Zn2Cys6	predicted protein
	FGSG_07482	GzZC205	4	2	54.2928											4								Zn2Cys6	conserved hypothetical protein
	FGSG_06750	GzZC206	4	2	42.7783											4								Zn2Cys6	conserved hypothetical protein
	FGSG_06699	GzZC207	4	2	44.3991											4								Zn2Cys6	conserved hypothetical protein
	FGSG_05725	GzZC208	4	2	41.3165											4								Zn2Cys6	conserved hypothetical protein
	FGSG_05716	GzZC209	4	2	45.1169											4								Zn2Cys6
	FGSG_05682	GzZC210	4	2	39.2792											4								Zn2Cys6	conserved hypothetical protein
	FGSG_05646	GzZC211	4	2	41.7871											4								Zn2Cys6	conserved hypothetical protein
	FGSG_03044	GzZC212	4	2	37.0133											4								Zn2Cys6	predicted protein
	FGSG_03037	GzZC213	4	2	46.3471											4								Zn2Cys6	predicted protein
	FGSG_02969	GzZC214	4	2	46.2416											4								Zn2Cys6	conserved hypothetical protein
	FGSG_05503	GzZC215	4	2	44.2497											4								Zn2Cys6	hypothetical protein similar to zinc finger transcription factor 1
	FGSG_04191	GzZC216	4	2	45.1644											4								Zn2Cys6	conserved hypothetical protein
	FGSG_04109	GzZC217	4	2	44.8543											4								Zn2Cys6	conserved hypothetical protein
	FGSG_03327	GzZC218	4	3	83.1404	yellow										4								Zn2Cys6	predicted protein
	FGSG_03322	GzZC219	4	2	45.7791											4								Zn2Cys6	predicted protein
	FGSG_03294	GzZC220	4	2	42.231											4								Zn2Cys6	conserved hypothetical protein
	FGSG_03292	GzZC221	4	2	39.0987											4								Zn2Cys6	conserved hypothetical protein
	FGSG_03246	GzZC222	4	2	37.7581											4								Zn2Cys6	conserved hypothetical protein
	FGSG_03226	GzZC223	4	2	44.4479											4								Zn2Cys6	hypothetical protein similar to C6 zinc finger domain protein
	FGSG_03219	GzZC224	4	2	40.2454											4								Zn2Cys6	conserved hypothetical protein
	FGSG_03214	GzZC225	4	2	45.8444											4								Zn2Cys6	conserved hypothetical protein
	FGSG_03207	GzZC226	4	2	53.0737											4								Zn2Cys6	conserved hypothetical protein
	FGSG_03201	GzZC227	4	2	41.3573											4								Zn2Cys6	conserved hypothetical protein
	FGSG_05789	GzZC228	4	2	43.769											4								Zn2Cys6	predicted protein
	FGSG_06160	GzZC229	4	2	42.1669											4								Zn2Cys6	conserved hypothetical protein
	FGSG_07133	GzZC230	4	2	38.3317											2								Zn2Cys6	conserved hypothetical protein
	FGSG_07079	GzZC231	4	2	43.8152											4								Zn2Cys6	conserved hypothetical protein
	FGSG_07067	GzZC232	4	N/A											NP, Vir, MM	4								Zn2Cys6
	FGSG_07368	GzZC233	4	2	41.747											4		Os						Zn2Cys6	conserved hypothetical protein
	FGSG_01378	GzZC234	4	2	40.6864											4								Zn2Cys6	conserved hypothetical protein
	FGSG_01318	GzZC235	4	2	42.6662											4								Zn2Cys6	conserved hypothetical protein
	FGSG_01293	GzZC236	4	2	35.9619											4								Zn2Cys6	conserved hypothetical protein
	FGSG_06915	GzZC237	4	2	40.6239											4								Zn2Cys6	conserved hypothetical protein
	FGSG_03159	GzZC238	4	2	43.7052											4								Zn2Cys6	conserved hypothetical protein
	FGSG_03138	GzZC239	4	1	32.9095											4								Zn2Cys6	conserved hypothetical protein
	FGSG_03102	GzZC240	4	2	42.7737											4								Zn2Cys6	predicted protein
	FGSG_04459	GzZC241	4	2	41.9941											4								Zn2Cys6	predicted protein
	FGSG_06593	GzZC242	4	2	44.5993								△HAT			4								Zn2Cys6	conserved hypothetical protein
	FGSG_03702	GzZC243	4	2	42.8836											4								Zn2Cys6	conserved hypothetical protein
	FGSG_03683	GzZC244	N/A													N/A								Zn2Cys6
	FGSG_02167	GzZC245	4	2	38.1392											4								Zn2Cys6	conserved hypothetical protein
	FGSG_02083	FgArt1	4	N/A												0								Zn2Cys6	hypothetical protein similar to C6 zinc finger protein
	FGSG_02068	GzZC247	4	2	46.5072											2								Zn2Cys6	conserved hypothetical protein
	FGSG_01176	FHS1	4	2	53.406											2	DDR	Os	ROS	Fung				Zn2Cys6	putative transcription factor involved in DNA damage response
	FGSG_01172	GzZC249	4	2	35.8218											4								Zn2Cys6	predicted protein
	FGSG_02531	GzZC250	4	2	53.3895	yellow										4		Os						Zn2Cys6	conserved hypothetical protein
	FGSG_02435	GzZC251	4	2	37.506											4								Zn2Cys6	conserved hypothetical protein
	FGSG_05370	GzZC252	4	3	95.337	yellow										4								Zn2Cys6	conserved hypothetical protein
	FGSG_05350	GzZC253	4	2	39.8938											4								Zn2Cys6	conserved hypothetical protein
	FGSG_05332	GzZC254	4	2	44.2668											4								Zn2Cys6	conserved hypothetical protein
	FGSG_05279	GzZC255	4	2	37.9824											4								Zn2Cys6	conserved hypothetical protein
	FGSG_02799	GzZC256	4	2	43.0713											4								Zn2Cys6	conserved hypothetical protein
	FGSG_02696	GzZC257	4	2	43.9163											4								Zn2Cys6	conserved hypothetical protein
	FGSG_09318	GzZC258	4	2	39.8038											4								Zn2Cys6	conserved hypothetical protein
	FGSG_02554	GzZC259	4	2	37.0008											4								Zn2Cys6	conserved hypothetical protein
	FGSG_02874	GzZC260	4	2	44.8652											4								Zn2Cys6	conserved hypothetical protein
	FGSG_02854	GzZC261	4	2	41.6863											4								Zn2Cys6	conserved hypothetical protein
	FGSG_03551	GzZC262	4	2	44.1505											4								Zn2Cys6	conserved hypothetical protein
	FGSG_03508	GzZC263	4	2	42.8057											4								Zn2Cys6	predicted protein
	FGSG_03485	GzZC264	N/A													N/A								Zn2Cys6
	FGSG_01760	GzZC265	4	2	42.186								△RNAi			4								Zn2Cys6	predicted protein
	FGSG_01724	GzZC266	N/A													N/A								Zn2Cys6
	FGSG_01669	GzZC267	4	2	45.3248								△HAT			4								Zn2Cys6	predicted protein
	FGSG_04311	GzZC268	4	2	34.418											4								Zn2Cys6	conserved hypothetical protein
	FGSG_05157	GzZC269	4	2	37.9488											4								Zn2Cys6	conserved hypothetical protein
	FGSG_04974	GzZC270	4	2	46.3156											4								Zn2Cys6	conserved hypothetical protein
	FGSG_04901	GzZC271	3	2	44.4237											4								Zn2Cys6	conserved hypothetical protein
	FGSG_04888	GzZC272	4	2	45.4297											4								Zn2Cys6	conserved hypothetical protein
	FGSG_05120	GzZC273	4	1	29.7785											4								Zn2Cys6	positive regulator of purine utilization
	FGSG_05068	GzZC274	4	2	41.6942											4								Zn2Cys6	conserved hypothetical protein
	FGSG_01638	GzZC275	4	2	39.4884											4								Zn2Cys6	conserved hypothetical protein
	FGSG_01564	GzZC276	4	2	41.4773											4								Zn2Cys6	probable ZFR1 regulator of fumonisin biosynthesis
	FGSG_01562	GzZC277	4	2	45.9337											4								Zn2Cys6	conserved hypothetical protein
	FGSG_06503	GzZC278	4	2	35.3085											4								Zn2Cys6	conserved hypothetical protein
	FGSG_06442	GzZC279	4	2	42.163											4								Zn2Cys6	conserved hypothetical protein
	FGSG_06436	GzZC280	4	2	56.1589											4								Zn2Cys6	predicted protein
	FGSG_00725	GzZC281	4	2	39.9777											4								Zn2Cys6	conserved hypothetical protein
	FGSG_00719	GzZC282	4	2	33.9773											4								Zn2Cys6	conserved hypothetical protein
	FGSG_00713	GzZC283	4	2	46.1018											4								Zn2Cys6	conserved hypothetical protein
	FGSG_02410	GzZC284	4	2	44.3179											4								Zn2Cys6	conserved hypothetical protein
	FGSG_02384	GzZC285	4	2	45.9126											4								Zn2Cys6	predicted protein
	FGSG_02368	GzZC286	4	2	61.8429											4								Zn2Cys6	related to fungal specific transcription factor
	FGSG_02323	GzZC287	4	2	40.924											4								Zn2Cys6	similar to AurR2, aurofusarin cluster transcription factor
	FGSG_02320	GIP2	4	2	51.3325											4				Fung				Zn2Cys6	positive acting transcription factor for the aurofusarin gene cluster
	FGSG_06382	GzZC289	4	2	51.0507											4								Zn2Cys6	conserved hypothetical protein
	FGSG_06324	GzZC290	4	2	34.6464											4								Zn2Cys6	conserved hypothetical protein
	FGSG_04862	GzZC291	N/A													N/A								Zn2Cys6
	FGSG_04830	GzZC292	4	2	43.4982											4								Zn2Cys6	conserved hypothetical protein
	FGSG_04803	GzZC293	N/A													N/A								Zn2Cys6
	FGSG_04786	GzZC294	4	2	52.1518								△RNAi			4								Zn2Cys6	conserved hypothetical protein
	FGSG_04747	GzZC295	4	2	47.8711											4								Zn2Cys6	conserved hypothetical protein
	FGSG_03786	GzZC296	4	2	41.4985											4								Zn2Cys6	conserved hypothetical protein
	FGSG_03727	GzZC297	4	2	45.4156											4								Zn2Cys6	conserved hypothetical protein
	FGSG_00800	GzZC298	N/A													N/A								Zn2Cys6
	FGSG_00774	GzZC299	4	2	55.3021											4								Zn2Cys6	conserved hypothetical protein
	FGSG_00625	GzZC300	4	2	41.2682											4								Zn2Cys6	conserved hypothetical protein
	FGSG_00404	GzZC301	4	N/A												4	DDR							Zn2Cys6	conserved hypothetical protein
	FGSG_00574	GzZC302	3	3	72.0975										NP, Vir, MM	4	DDR	Os	ROS	Fung			pH11	Zn2Cys6	related to purine utilization positive regulator
	FGSG_00573	GzZC303	3	3	91.3836											4	DDR	Os	ROS	Fung			pH11	Zn2Cys6	related to GAL4 like transcriptional activator
	FGSG_00313	GzZC304	4	2	43.4861											4								Zn2Cys6	conserved hypothetical protein
	FGSG_00147	GzZC305	4	2	42.7625											4					CW			Zn2Cys6	conserved hypothetical protein
	FGSG_00144	GzZC306	N/A													N/A								Zn2Cys6
	FGSG_00011	GzZC307	4	2	54.2058											4								Zn2Cys6	conserved hypothetical protein
	FGSG_00235	GzZC308	4	2	37.3403											4								Zn2Cys6	predicted protein
	FGSG_00227	GzZC309	4	N/A												4								Zn2Cys6
	FGSG_00196	GzZC310	4	2	37.4185											4								Zn2Cys6	conserved hypothetical protein
	FGSG_00217	GzZC311	4	1	32.1709											4								Zn2Cys6	conserved hypothetical protein
	FGSG_00102	GzZC312	4	2	44.0047											4								Zn2Cys6	conserved hypothetical protein
	FGSG_00052	GzZC313	4	2	34.0798											4								Zn2Cys6	conserved hypothetical protein
	FGSG_00081	GzZC314	4	2	48.4803											4								Zn2Cys6	conserved hypothetical protein
	FGSG_00069	GzZC315	4	2	43.5468											4								Zn2Cys6	conserved hypothetical protein
	FGSG_00125	GzZC316	4	N/A												4								Zn2Cys6	predicted protein
	WT-VI	Gz03639			47.4745
a Analysis data were extracted and modified from original reports (Lee et al., 2014). Pale-red, significantly increased gene expression level following virus infection; pale-blue, significantly decreased gene expression level following virus infection
b Analysis data were extracted and modified from original reports (Wang et al., 2016).
c Analysis data were extracted and modified from original report (Son et al., 2011). List of TF mutants showing mutliple defects. NP, no perithecia development; Vir, reduced virulence; DON, abnormal deoxynivaleol production; MM, growth defect in mycelial growh on minimal medium.
d Analysis data were extracted and modified from original report (Son et al., 2016). TF deletion mutant showed susceptible or resistance response against DNA-damaging agent compared to wild-type. After inoculation on CM with or without DNA-damaging agent such as methyl methanesulfonate, hydroxyurea, bleomycin, camptothecin and then compared their grown on media.
e Analysis data were extracted and modified from original report (Son et al., 2011). List of TF mutants showing sensitive stress response. Os, sensitive in osmotic stress; ROS, sensitive in ROS stress; Fung, sensitive in fungicide response; CW, sensitive in cell wall stress; pH4 and pH11, sensitive responses in pH4 and pH11 stress, respectively. The red color letter means resistance response agai…
f Analysis data were extracted and modified from original report (Son et al., 2011). Production of DON was quantified compared to wild-type strain (6, overproduction; 4, similar to wild-type strain; 2, reduced production; 0, no detectable production).
g Analysis data were extracted and modified from original report (Son et al., 2011). Percentage of average radial growth on potato dextrose agar media (PDA) of deletion mutants compared to wild-type strain was scored (5, more than wild-type strain; 4, 91-100%; 3, 61-90%; 2, 31-60 %; 1, 0-30 %; 0, 0 %).
h Relative radial growth on complete media of FgV1-infected TF deletion mutants compared to virus-freee strain or wild-type strain was divided in group (1, under 33; 2, 33-63; 3, 63-100).
i N/A, not applicable. In case of FgV1-infected line, we failed to virus transmission using hyphal anastomosis with repeated trials at least three times.
j-m Target gene showed different gene expresssion in mutants.
j △RNAi, target gene response to deletion mutant of FgDICER-1/FgDICER-2 and FgAGO-1/FgAGO-2. Analysis data were extracted and modified from original report (Son et al., 2018).
k △HAT, FgSAS3 or FgGCN5 deletion mutant gene response. Analysis data were extracted and modified from original report (Kong et al., 2018).
l Oxi, Oxidative stress response. TF that were change in gene expression level after H2O2 treatment. Analysis data were extracted and modified from original report (Lee et al., 2017).
m SD, required for sexual development. Genes seggested as transcriptionally regulated genes by both the MAT1-1 and MAT1-2 loci. Analysis data were extracted and modified from original report (Kim et al., 2015).

## Sheet: Summary
TF Classification	# of TF	# of del	TF-FgV1	Group 1	Group2	Group3	N
bHLH	16	15	15	0	11	4
bZIP	22	22	22	0	21	1
C2H2 zinc finger	98	94	94	5	84	5
Heteromeric CCAAT factors	8	8	8	3	5	0
HMG	37	34	34	3	30	1
Homeodomain-like	14	7	7	1	6	0
Nucleic acid-binding, OB-fold	47	40	40	4	35	1
Winged helix repressor DNA-binding	27	26	26	0	23	3
Helix-turn-helix, AraC type	8	7	7	0	6	1
GATA type zinc finger	8	7	7	0	7	0
Zinc finger, CCHC-type	12	12	12	0	12	0
Zn2Cys6 zinc finger	316	296	286	16	254	16	10
Myb	19	17	17	1	13	3
others	77	72	65	2	52	11	7
Total	709	657	640	35	559	46	17
